# Supplementary material
Source: MDPI journal article supplement (https://www.mdpi.com/2075-163X/12/10/1194)
Supplement: s1 [file s1 › minerals-1851930-supplementary.pdf]

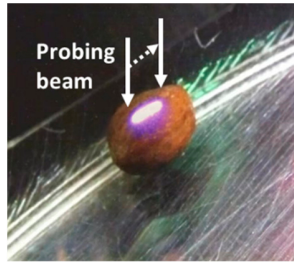

**Figure S1.** A seed scanned by a probing beam. The bright region on the seed indicates the scan line.

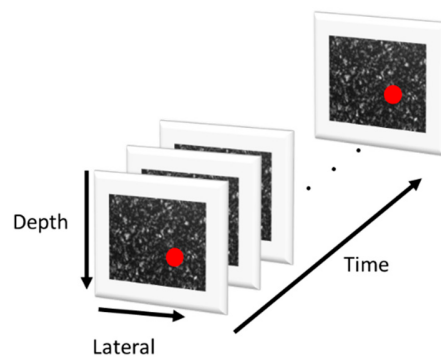

**Figure S2.** Time sequence speckle images for the calculation of biospeckle contrast. The red dot represents the intensity of reflected light at a point over time.

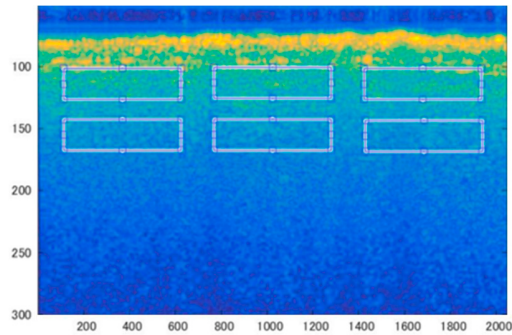

**Figure S3.** OCT structural image (x-z) scans with six regions of interest (ROI) indicated by rectangles. Each rectangle corresponds to 512 x 25 pixels. The average contrast of the ROIs was used to calculate the average across six seeds to give the grand average.

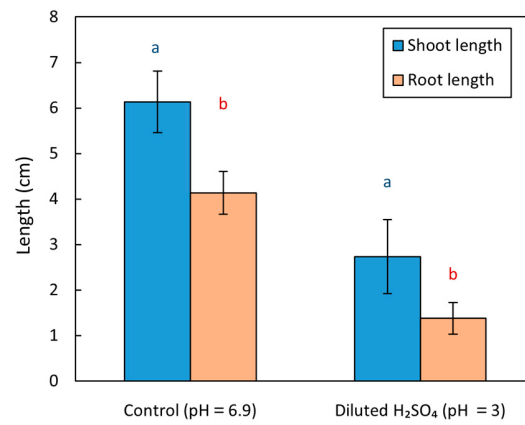

**Figure S4.** Effect of diluted H<sub>2</sub>SO<sub>4</sub> solution (pH = 3) on the shoot and root length of soybean seedlings.
